# Supplementary material for: Intravaginal Chlamydia trachomatis Challenge Infection Elicits TH1 and TH17 Immune Responses in Mice That Promote Pathogen Clearance and Genital Tract Damage
Source: PubMed Central journal article supplement (PMC5015975; doi:10.1371/journal.pone.0162445), 2016-09-08
Supplement: pone.0162445.s001.pdf [file pone.0162445.s001.pdf]

Supporting information

**Intravaginal *Chlamydia trachomatis*  
Challenge Infection Elicits T<sub>H</sub>1 and T<sub>H</sub>17  
Immune Responses in Mice that Promote  
Pathogen Clearance and Genital Tract  
Damage**

Rodolfo D. Vicetti Miguel\*, Nirk E. Quispe Calla,  
Stephen D. Pavelko, Thomas L. Cherpes

\*Corresponding author e-mail: [vicettimiguel.1@osu.edu](mailto:vicettimiguel.1@osu.edu)
