# Supplementary material for: Intravaginal Chlamydia trachomatis Challenge Infection Elicits TH1 and TH17 Immune Responses in Mice That Promote Pathogen Clearance and Genital Tract Damage
Source: PubMed Central journal article supplement (PMC5015975; doi:10.1371/journal.pone.0162445), 2016-09-08
Supplement: pone.0162445.s002.pdf [file pone.0162445.s002.pdf]

**A**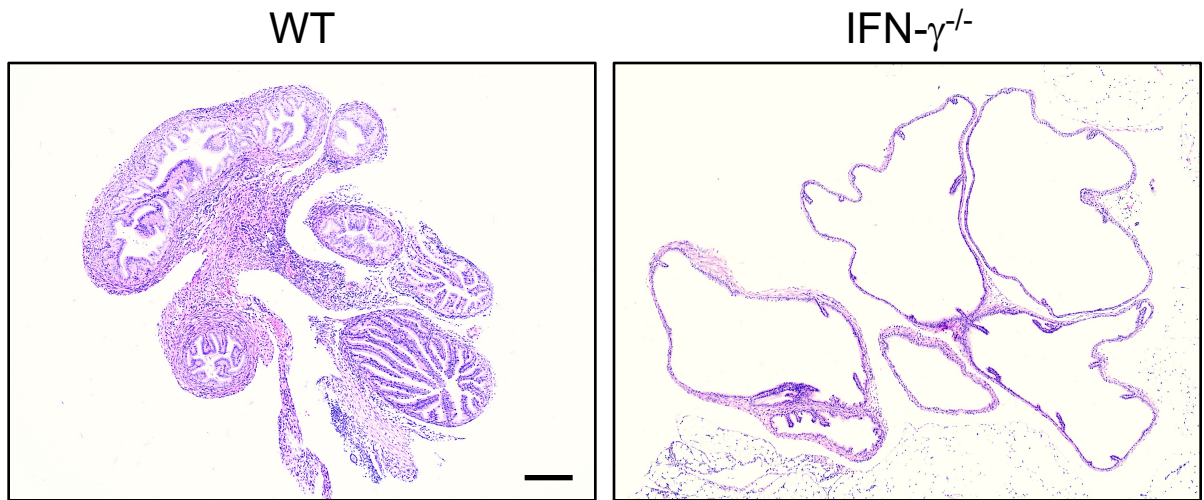**B**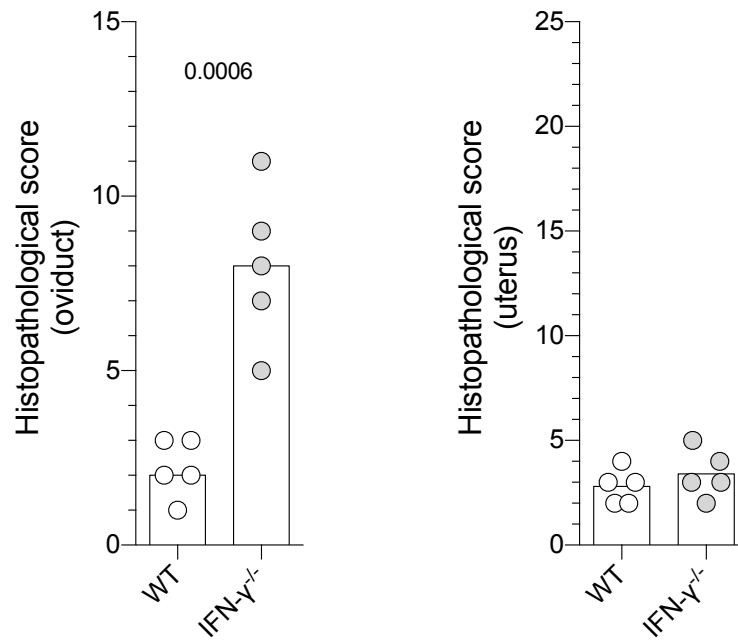

**S2 Fig.** Hydrosalpinx formed in IFN- $\gamma^{-/-}$  mice genitally infected with  $10^4$  IFU of *C. trachomatis* serovar D.
