# Supplementary material for: Intravaginal Chlamydia trachomatis Challenge Infection Elicits TH1 and TH17 Immune Responses in Mice That Promote Pathogen Clearance and Genital Tract Damage
Source: PubMed Central journal article supplement (PMC5015975; doi:10.1371/journal.pone.0162445), 2016-09-08
Supplement: pone.0162445.s003.pdf [file pone.0162445.s003.pdf]

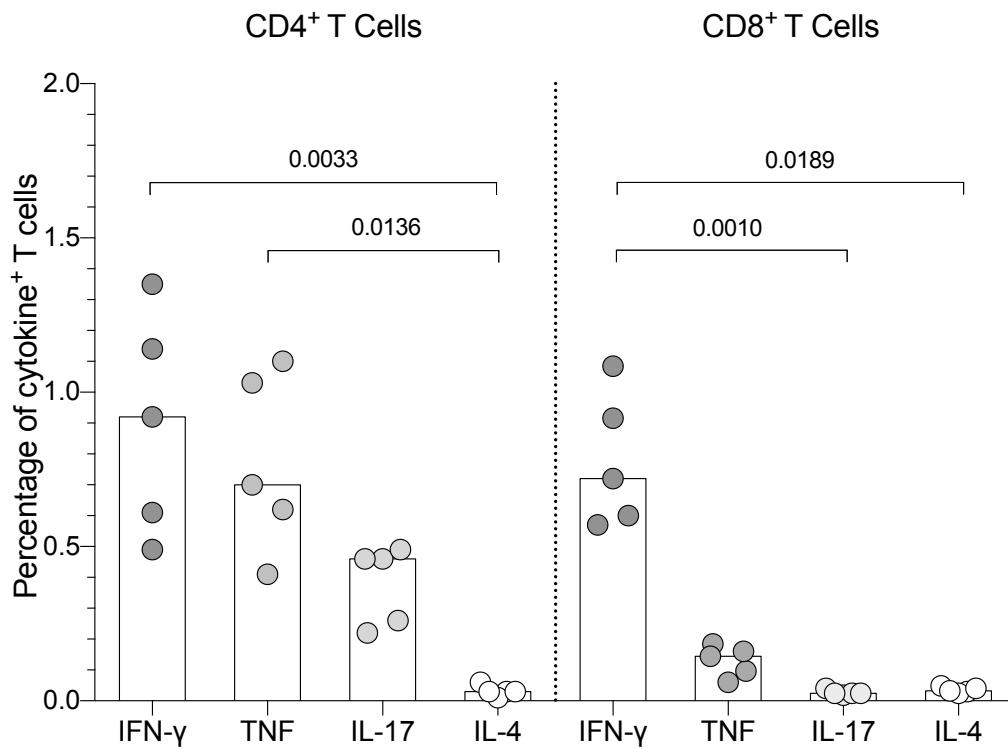

**S3 Fig.** C57BL/6J mice developed robust Type 1 *Chlamydia*-specific CD4<sup>+</sup> and CD8<sup>+</sup> T cell responses after genital *C. trachomatis* infection.
