# Supplementary material for: Intravaginal Chlamydia trachomatis Challenge Infection Elicits TH1 and TH17 Immune Responses in Mice That Promote Pathogen Clearance and Genital Tract Damage
Source: PubMed Central journal article supplement (PMC5015975; doi:10.1371/journal.pone.0162445), 2016-09-08
Supplement: pone.0162445.s004.pdf [file pone.0162445.s004.pdf]

**A**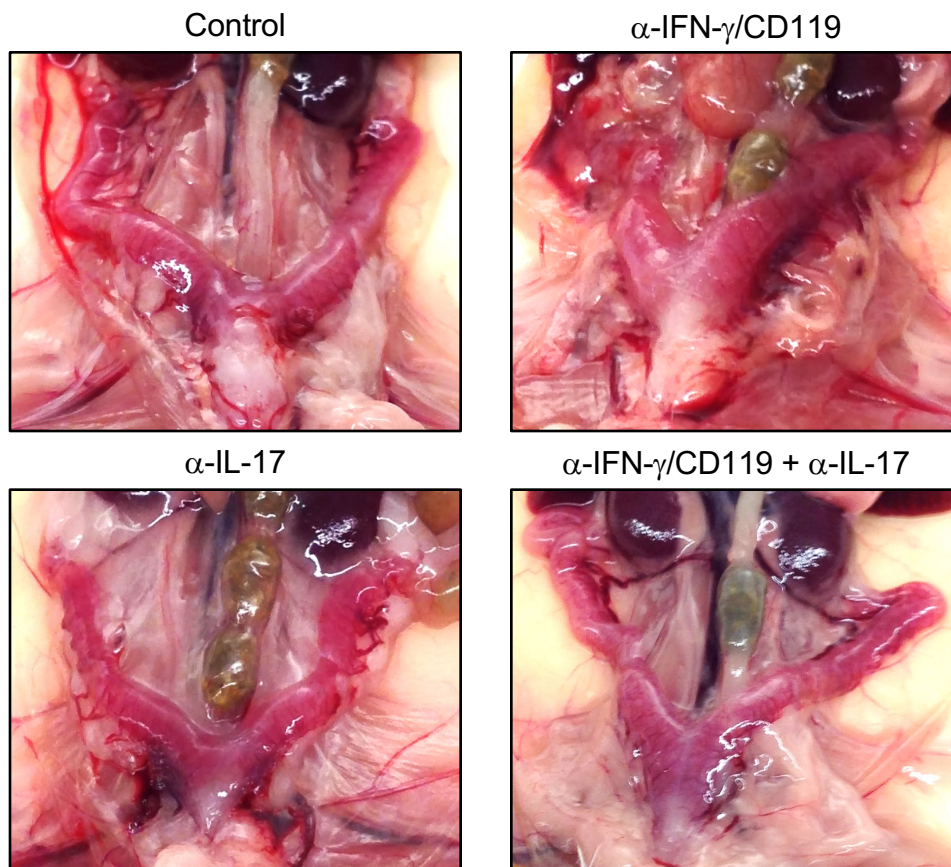**B**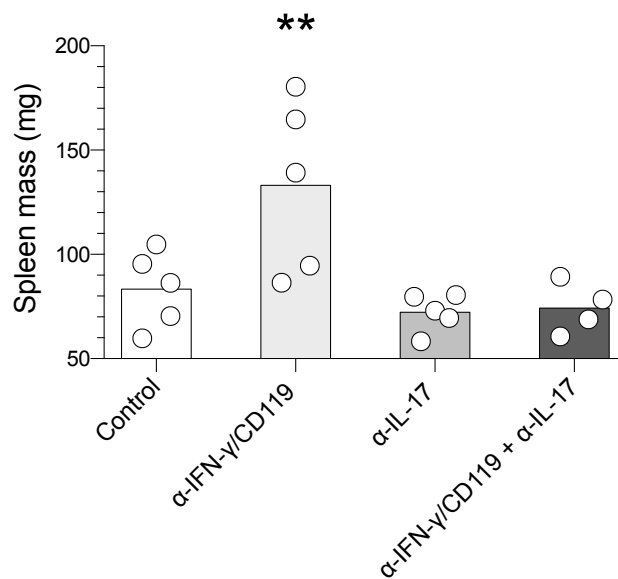

**S4 Fig.** IFN- $\gamma$  signaling blockade enhanced *Chlamydia*-specific T<sub>H</sub>17 immune responses inducing immunopathological genital tissue damage.
