# Supplementary material for: Intravaginal Chlamydia trachomatis Challenge Infection Elicits TH1 and TH17 Immune Responses in Mice That Promote Pathogen Clearance and Genital Tract Damage
Source: PubMed Central journal article supplement (PMC5015975; doi:10.1371/journal.pone.0162445), 2016-09-08
Supplement: pone.0162445.s005.pdf [file pone.0162445.s005.pdf]

**A** Uninfected age-matched control

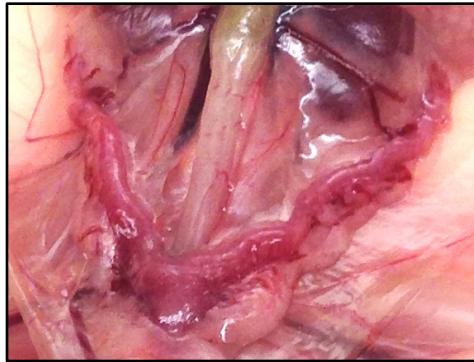

Repetitive infection

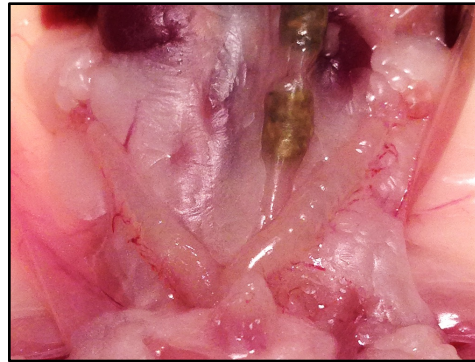

**B** Uninfected age-matched control

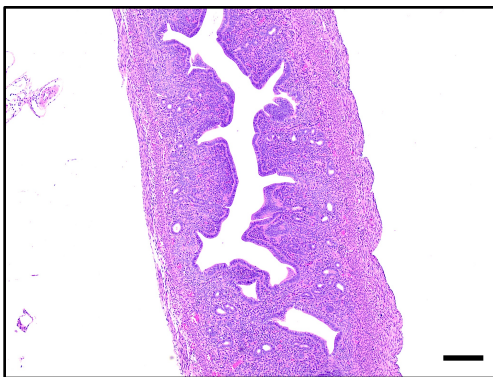

Repetitive infection

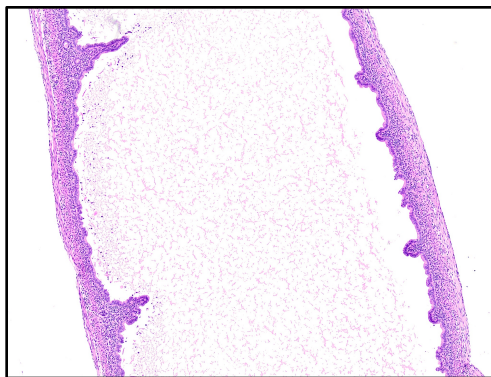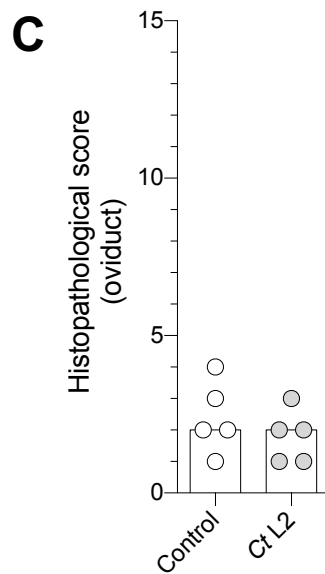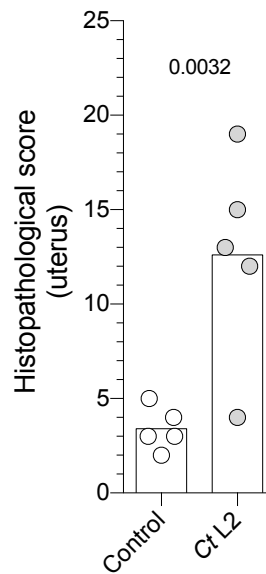

**S5 Fig.** Repetitive low-dose ivag challenge infections with *C. trachomatis* serovars D and L2 caused genital tissue damage.
